# 1 Polygenic Prediction of Complex Traits with Iterative Screen Regression 2 Models

3 Meng Luo<sup>1\*</sup>, Shiliang Gu<sup>1\*</sup>

4 <sup>1</sup>Jiangsu Provincial Key Laboratory of Plant Functional Genomics of Ministry of Education; Yangzhou University,  
5 Yangzhou, Jiangsu 225009, China.

6 \*Correspondence and requests for materials should be addressed to Meng Luo (email:[czheluo@gmail.com](mailto:czheluo@gmail.com)) or Shiliang  
7 Gu (email:[slgu@yzu.edu.cn](mailto:slgu@yzu.edu.cn)).

8 **Abstract:** Although genome-wide association studies have successfully identified thousands of  
9 markers associated with various complex traits and diseases, our ability to predict such phenotypes  
10 remains limited. A perhaps ignored explanation lies in the limitations of the genetic models and  
11 statistical techniques commonly used in association studies. However, using genotype data for  
12 individuals to perform accurate genetic prediction of complex traits can promote genomic selection  
13 in animal and plant breeding and can lead to the development of personalized medicine in humans.  
14 Because most complex traits have a polygenic architecture, accurate genetic prediction often  
15 requires modeling genetic variants together via polygenic methods. Here, we also utilize our  
16 proposed polygenic methods, which refer to as the iterative screen regression model (ISR) for  
17 genome prediction. We compared ISR with several commonly used prediction methods with  
18 simulations. We further applied ISR to predicting 15 traits, including the five species of cattle, rice,  
19 wheat, maize, and mice. The results of the study indicate that the ISR method performs well than  
20 several commonly used polygenic methods and stability.

21  
22  
23  
24  
25  
26  
27  
28  
29

## 30 **Introduction**

31 The continuous accumulation of genetic data in existing association analysis studies has led to  
32 increasing interest use of genetic markers to predict complex trait phenotypes and diseases<sup>1-3</sup>. In  
33 animals or plants, accurate phenotypic prediction using genetic markers can assist in selecting  
34 individuals that meet the needs of products (high breeding value) and can effectively promote  
35 breeding programs<sup>4-6</sup>. In human genetics, which accurate use of genetic markers for phenotypic  
36 prediction, especially the heritable and highly polygenic, can promote disease prevention and  
37 intervention<sup>7,8</sup>, such as, polygenic risk scores that have shown promise in predicting human  
38 complex traits and diseases, and may facilitate early detection, risk stratification, and prevention of  
39 common complex diseases in healthcare settings<sup>8-12</sup>. And the genotype information can be used to  
40 develop individualized drug delivery for customized treatment and predict possible outcomes<sup>13</sup>. In  
41 animals, such as cattle, producers have accepted the use of whole-genome selection techniques to  
42 evaluate and select offspring<sup>14</sup>. Besides, it also benefits plants. In wheat and maize, studies have  
43 shown that multi-cycle whole-genome selection can achieve better and desirable results<sup>2,15-17</sup>.  
44 Therefore, in recent years, researchers have regarded phenotype prediction as a critical step in joint  
45 functional genomics and genome-wide research<sup>10,18</sup>.

46 However, with the growth of high-throughput genomics data, accurate phenotype prediction  
47 requires the development of statistical methods that can simulate all or majors SNPs  
48 simultaneously<sup>9,19,20</sup>. Moreover, previous genome-wide association analysis studies have shown  
49 that many complex trait phenotypes and diseases have a polygenic genetic background, mainly  
50 controlled by many genetic variation sites with smaller effects. For example, in human genetics,  
51 Hundreds of mutation sites have been evaluated to affect human height and body mass index (BMI)  
52 <sup>21,22</sup>, making the height and BMI of different groups of people diversified. Similarly, in the complex  
53 traits of animals and plants, there are phenotypic variations controlled by dozens of variation sites,  
54 such as traits related to rice yield composition<sup>23</sup>; features about cattle, such as back fat, milk yield,  
55 And carcass weight<sup>24,25</sup>. Because complex traits and common diseases have a multi-gene structure,  
56 only a few identified related mutation sites (SNPs) explain a small part of the phenotypic variation,  
57 so accurate phenotype and disease risk prediction cannot be drawn. On the contrary, accurate  
58 phenotype prediction requires a multi-gene model to be able to utilize all or major genome-wide  
59 SNPs genetic marker variations that explain the phenotype. In the past ten years, multi-gene models  
60 have been successfully developed and applied for prediction, and many animal breeding programs  
61 have been changed in the context of selection<sup>26-29</sup>. In addition, recently, the application of polygenic  
62 models in human GWASs has also achieved promised results<sup>30-33</sup>.

63 Most of the existing polygenic models used for prediction make assumptions about the  
64 distribution of effect sizes. The different methods are mainly due to the differences in the  
65 assumptions of these other models. For example, the commonly used linear mixed model (LMM),  
66 also known as the genomic best linear unbiased prediction (GBLUP)<sup>34</sup>, and rrBLUP that one of the  
67 first methods proposed for genomic selection was ridge regression (RR) which is equivalent to best  
68 linear unbiased prediction (BLUP) when the genetic covariance between lines is proportional to  
69 their similarity in genotype space<sup>35</sup>. And both assume that the size of the effect obeys a normal  
70 distribution<sup>33,35</sup>; also, the Bayes alphabetic included BayesA, and BayesB methods assume it the  
71 distribution of the effect size follows the t distribution or other distributions<sup>36,37</sup>; the effect size  
72 assumed by BayesC is also a normal distribution<sup>36</sup>; Bayes LASSO follows the double exponential  
73 and Laplace distribution<sup>38,39</sup>; the BSLMM assumption follows A mixture of two normal  
74 distributions<sup>28</sup>; while BayesR assumes a three-component normal distribution mixture<sup>40</sup>; Bayes no-  
75 parameter model (DPR, Dirichlet process regression)<sup>19</sup> does not rely on any specific assumptions,  
76 but according to the Dirichlet Process Regression to give the hypothesis of a particularly suitable  
77 model. Given many model choices, people naturally think of which method can be used for any  
78 particular trait. Previous studies have shown that accurate prediction needs to choose a priori effect  
79 size distribution, which can be near consistent with the true effect size distribution. The inferred  
80 posterior can be well approximated to the traits with a multi-gene structure under consideration<sup>30,40</sup>.  
81 However, the priority of the effect size distribution for any particular trait or disease is unknown.  
82 Therefore, in order to maximize the model's strong performance, the most important thing is to  
83 have a reasonable effect size distribution assumption, not the prior distribution while is flexible  
84 enough. As close as possible to the true effect distribution<sup>28,40</sup>.

85 For highly polygenic traits, it is assumed that the normal distribution can well fit the true effect  
86 size distribution. Therefore, LMM (linear mixed model) can obtain high predictive power<sup>28,40</sup>. As  
87 we all know, the effect size of each SNP site that causes phenotypic variation that can be divided  
88 into small effects, medium effects, and large effects (directly influence (or perfectly tag a variant  
89 that directly influences) the trait of interest, associated ) which inferred that weak effect (small and  
90 medium) and strong effect<sup>27,41,42</sup>; These classifications are based on ordinary least squares (OLS)  
91 effect size estimates for each SNP in a regression framework. The remaining loci have no effect  
92 (have no effect on the trait at all, non-associated). So if exiting a model make it true which is good  
93 enough to have identified all loci, can put all the loci are identified, and make use of these variable  
94 loci are also very reasonable to predict and prediction the result is a very good performance, such  
95 as, BayesR<sup>28,40</sup>. Here, we proposed the Iterative Screen Regression (ISR) also assumes that its effect  
96 size fits a normal distribution. In this study, the proposed Iterative Screen Regression model was

97 used to explore the phenotype prediction and compared it with other commonly used methods in  
98 simulation and real phenotype prediction. We use simulation and real data applications to explain  
99 and analyze the advantages and disadvantages of ISR for phenotypic prediction. Results from ISR  
100 are compared with commonly polygenic prediction models, which included DPR, BayesR,  
101 BSLMM (Bayesian sparse linear mixed model), Bayes, BayesB, BayesC, BayesLASSO and  
102 rrBLUP and the genomic selection of 15 traits of five species and 10 complex traits of white mice  
103 will be used for genetic prediction analysis.

## 104 **Results**

105 **Method overview.** An overview of our method is provided in the Methods section. For details  
106 please see ISR<sup>42</sup>. Briefly, we offered a new regression statistics method and combined a unique  
107 variable screening procedure (Fig.1).

108 **Simulations.** We first compare the performance of ISR with several other commonly used  
109 prediction methods using simulations. A total of seven different methods are included for  
110 comparison: (1) DPR; (2) BSLMM (GEMMA); (3) BayesA; (4) BayesB; (5) BayesC; (6)  
111 BayesLASSO; (7) rrBLUP. Note that DPR has been recently demonstrated to outperform a range  
112 of existing prediction methods (e.g., BayesR and MultiBLUP ); thus, we do not include other  
113 prediction methods into comparison for polygenic prediction.

114 To make our simulations as real as possible, we used genotypes from an existing cattle GWAS  
115 dataset with 5024 individuals and 42,551 SNPs and simulated phenotypes. To cover a range of  
116 possible genetic architectures, we consider sixteen simulation settings from four different  
117 simulation scenarios with the phenotypic variance explained (PVE) by all SNPs being either 0.2,  
118 0.5, or 0.8 (details in Methods). In each setting for each PVE value, we performed 20 simulation  
119 replicates. In each replicate, we randomly split the data into training data with 80% individuals and  
120 test data with the remaining 20% individuals. We then fitted different methods on the training data  
121 and evaluated their prediction performance on the test data. We evaluated prediction performance  
122 using either the squared correlation coefficient ( $R^2$ ) or mean squared error (MSE). We contrasted  
123 the prediction performance of all other methods with that of ISR by taking the difference of  $R^2$  or  
124 MSE between the other methods and ISR. Therefore, an  $R^2$  difference below zero or an MSE  
125 difference above zero suggests worse performance than ISR. For each result of the box plot, it  
126 consists of five numerical points: minimum (lower edge), lower quartile (25%, Q1), median (solid  
127 line in the box), upper quartile (75 %, Q3), and maximum value (upper edge). The lower quartile,  
128 median, and upper quartile form a box with compartments. An extension line is established between  
129 the upper quartile and the maximum value. This extension line is called a "whisker". Since there  
130 are always large differences in the values, these deviating data points are listed separately in the

131 figure (the blue points in the figure), so the whiskers in the figure can be modified to the smallest  
132 observation value and the largest observation in two levels Value, that is, the maximum observation  
133 value ( $\max = Q3 - 1.5 \times IQR$ ) and the minimum observation value ( $\min = Q1 + 1.5 \times IQR$ ) is set to  
134 1.5 IQR (interquartile range) of the distance between the quartile value.

135 Figure 2 shows  $R^2$  and MSE differences for different methods across 20 replicates in each of the  
136 four simulation settings for  $PVE = 0.5$ . Because Fig. 2 shows prediction performance difference, a  
137 large sample variance of a method in the figure only implies that the prediction performance of the  
138 method differs a lot from that of ISR, but does not imply that the method itself has a large variation  
139 in predictive performance. Supplementary Table 1 shows the means and the standard deviation of  
140 absolute  $R^2$  values across cross variation replicates; various methods display similar prediction  
141 variability. Supplementary Figs. 1 and 2 show the  $R^2$  and MSE differences for  $PVE = 0.2$  and  $PVE$   
142  $= 0.8$ , respectively. The  $R^2$  and MSE values of the baseline method, ISR, are shown in the  
143 corresponding figure legend.

144 As in the previous study shown<sup>19</sup>, each method works the best when their modeling assumption  
145 is satisfied. In our study also shown that ISR is robust and performs well and stabilization across  
146 all twelve settings from four scenarios. For example, if we rank the methods based on their median  
147 of  $R^2$  and MSE difference (boxplot red line) performance across replicates, then when the total  
148 PVE is moderate (e.g.,  $PVE = 0.5$ , Fig. 2; note that for each PVE there are a total of four simulation  
149 settings for the four scenarios), are the best or among the best (where “among the best” refers to  
150 the case when the difference between the given method and the best method is within  $\pm 0.005$  with  
151 ISR) in four simulation settings. Similarly, when the total PVE is high (e.g.,  $PVE = 0.8$ ,  
152 Supplementary Fig. 2), ISR is the best or among the best in four simulation settings and  
153 performance more stabilization in four simulation settings, and it is ranked as the second-best in  
154 scenario II which based on Scenario I that we appended 50 SNPs to group-three SNPs. Even when  
155 ISR is ranked as the second-best method, the difference between ISR and the best method is often  
156 small. Among the rest of the methods, BSLMM, BayesA, BayesLASSO, rrBLUP, BayesB, BayesC  
157 all work well in polygenic settings (e.g.,  $PVE = 0.2$ , Supplementary Fig. 1, scenario I, scenario III,  
158 and scenario IV) but can perform poorly in sparse settings with high PVE (e.g.,  $PVE = 0.8$ ,  
159 Supplementary Fig. 2). The performance of DPR and BSLMM in polygenic vs. sparse settings  
160 presumably stems from their polygenic assumptions on the effect size distribution. In contrast,  
161 because of the sparse assumption on the effect size distribution, DPR has an advantage in sparse  
162 settings (e.g.,  $PVE = 0.8$ , Supplementary Fig. 2; scenario III and scenario IV) but the performance  
163 of DPR is also generally worse than ISR in the challenging setting when PVE is either small or

164 moderate, presumably because of the much simpler prior assumption employed in BVSR for the  
165 non-zero effects.

166 **Real data applications.** To gain further insights, we compare the performance of ISR with the  
167 other methods in four real data sets to perform genomic selection in animal and plant studies.

168 We compare the performance of ISR with the other methods in predicting phenotypes in three  
169 GWAS data sets: (1) a cattle study<sup>25</sup>, where we focus on three phenotypes: milk fat percentage  
170 (MFP), MY, as well as somatic cell score (SCS); (2) a rice study<sup>43</sup>, where we use GL as the  
171 phenotype; (3) the Carworth Farms White (CFW) data<sup>44</sup>, where we focus on ten traits that include  
172 that the heritability estimates are: 0.49 testweight (testes weight), 0.28 for soleus, 0.25 for plantaris,  
173 0.10 for fastglucose (fasting glucose), 0.41 for tibial (tibia length), 0.60 for BMD (Bone-mineral  
174 density), 0.39 for TA (tibialis anterior), 0.37 for EDL (extensor digitorum longus), 0.25 for gastric  
175 (gastrocnemius), and 0.29 for sacweight (Testis weights). (4) Wheat PHS data<sup>45</sup>. As in simulations,  
176 for each phenotype, we performed 20 Monte Carlo cross validation data splits, except for the wheat  
177 PHS data. In each data split, we fitted methods in a training set with 80% of randomly selected  
178 individuals and evaluated method performance using  $R^2$  or MSE in a test set with the remaining  
179 20% of individuals. Because the wheat PHS data set is small, we use the 10-fold cross validation  
180 method to analyze the predictive power of different methods, which is to randomly divide the  
181 sample into ten equal parts each time, and nine of them are used as training samples. The other one  
182 is used as a verification sample, and nine samples are used to estimate the parameters to predict the  
183 remaining one, and the loop 10 times in turn until all individuals are predicted. We again contrasted  
184 the performance of the other methods with that of ISR by taking the  $R^2$  difference or MSE  
185 difference with respect to ISR. The results are shown in Fig. 3 ( $R^2$  difference) and Supplementary  
186 Fig. 3 (MSE difference), with  $R^2$  and MSE of ISR presented in the corresponding figure legend.  
187 Supplementary Table 1 shows the means and standard deviation of absolute  $R^2$  values across cross  
188 variation replicates.

189 Overall, consistent with simulations, ISR shows robust performance across all traits and is ranked  
190 either as the best or the second-best method or equivalent. In the cattle data (Fig. 2a), for SCS and  
191 MY, both ISR and DPR perform the best. For MFP, ISR and DPR perform equivalent, followed  
192 BayesA, BayesB, BayesLASSO, BSLMM, rrBLUP, and BayesC. while BSLMM and rrBLUP do  
193 not perform well for MY in the cattle data, but their performance improves for MFP and SCS,  
194 consistent with scenario III and scenario IV (simulation hypothesis is constant). The relative  
195 performance of ISR, DPR BayesA, BayesB in the cattle data is compatible with the distinct genetic  
196 architectures that underlie the three complex traits<sup>25,46</sup>. While MFP and MY are affected by a few  
197 large or moderate effect SNPs and many small effect SNPs, SCS is a highly polygenic trait

198 influenced by many SNPs with small effects. BayesC performs poorly for these three traits in the  
199 cattle data. In the rice data (Fig. 2a), BayesA performs the best, followed by ISR, PDR, BayesB,  
200 BSLMM, rrBLUP, BayesC, BayesLASSO, suggesting that a few SNPs influence GL with large  
201 effects<sup>43</sup>. In the CFW data (Fig. 2b, c), ISR performs the best or among the best for testweight,  
202 soleus, plantaris, BMD, and TA. Its performance is comparable to BayesB and rrBLUP for plantaris,  
203 and follows right behind DPR. Its also performance is comparable to DPR, BayesA, BayesB, and  
204 rrBLUP for EDL, gastric, and sacweight, and follows right behind BSLMM. However, it can be  
205 seen from the MSE difference that compared with ISR, the performance is poor, and its value is  
206 above 0, indicating that the predictive power of this method is quite different, although there may  
207 be several times in the 20 cross-validations A large predictive power can be obtained. Both the  
208 CFW phenotype was low PVE<sup>44</sup>.

209 Because the wheat PHS is a family-based study that PHS resistance showed varied effects under  
210 different environments<sup>45</sup>. The wheat PHS resistance traits are rarely used in genome selection and  
211 evaluated (prediction) in current research. There are differences in the predictive power of different  
212 methods between different. To eliminate the environmental difference between indifference years,  
213 we have given the four-year BLUP estimate for calculation. The best performance is ISR, followed  
214 by BayesA, BayesB, BayesLASSO, rrBLUP, BSLMM, BayesC, and DPR (Supplementary Fig. 4).  
215 In each year's data, both are ISR performs best, and followed BayesA, BayesB, BayesLASSO, and  
216 rrBLUP, BSLMM, BayesC, and DPR.

217 **Overview.** Based on the Simulations and Real data applications (did not use the wheat PHS data)  
218 results from the averaged prediction of  $R^2$ , we use the TOPSIS and cluster methods to ranked all  
219 methods that all-around performance (Fig.4a,b, Supplementary Table 2). Both the TOPSIS and  
220 cluster showed the same result that ISR(0.63) is perform best, and followed by DPR(0.63),  
221 BayesA(0.59), BayesLASSO(0.57), rrBLUP(0.54), BayesB(0.48), BSLMM(0.36) and  
222 BayesC(0.22). If we included the wheat dataset perform the TOPSIS and cluster analysis that also  
223 showed the ISR(0.66) is perform best, and followed by BayesB(0.57), BayesA(0.54), DPR(0.53),  
224 BayesLASSO(0.46), rrBLUP(0.46), BSLMM(0.35) and BayesC(0.19)( Supplementary Fig. 6,  
225 Supplementary Table 2,3). Finally, we list the eight methods' computational time for the three traits  
226 only in a large dataset, the maize dataset (Supplementary Table 4). And we excluded the BayesC  
227 and added a new BayesR method. Here, we also compare predictive ability, but not described here  
228 again, as shown in the other dataset prediction results. For sampling-based methods (DPR, BayesR,  
229 BayesA, BayesB, BayesLASSO, and BSLMM), we measure the computational time based on a  
230 fixed 10,000 iterations. However, due to the different convergence properties of different  
231 algorithms, a fixed number of iterations in different methods may correspond to different mixing

232 performance<sup>19,20</sup>. In contrast, rrBLUP is the faster method, while DPR, BayesR, and BSLMM are  
233 as same as computationally efficient. ISR is computationally as efficient as the other three BayesA,  
234 BayesB, and BayesLASSO for YWK, but costest time for GDD and SSK traits.

235

## 236 **Discussion**

237 We have presented a novel statistical method, ISR, for the polygenic prediction of complex traits.  
238 ISR is a flexible model for the different effect size from the normal distribution (Fig.1), which can  
239 be split into three group effects: no effect, weaker effect, and stronger effect and developed for  
240 modeling polygenic traits in genetic association studies. By flexibly modeling the difference effect  
241 size, ISR can adapt to the polygenic architecture underlying many complex features and enjoys  
242 robust performance across a range of phenotypes. With simulations and applications to five species  
243 real data sets, we have illustrated the benefits of ISR. We have focused on one application of ISR,  
244 which genetic prediction of phenotypes. As the other polygenic methods<sup>28,40,47</sup>, ISR can also be  
245 applied to models of traits controlled by multiple genes. For example, ISR can be used to estimate  
246 the proportion of variance in phenotypes explained by each of SNPs<sup>42</sup>, a quantity that is commonly  
247 referred to as SNP heritability<sup>28,33</sup>. Because ISR assumes a flexible effect size distribution that is  
248 adaptive to the genetic architecture underlying a given trait, it also can provide an accurate  
249 estimation of SNP heritability<sup>42</sup>. As another example, ISR also can be applied to association  
250 mapping (GWAS)<sup>42</sup>(Supplementary Fig.9,10,11, and Supplementary Table 4).

251 Previous studies have shown that the ISR method has a strong power to identify variant loci. It  
252 performs better than current statistical analysis methods, so we use it to perform genome-wide  
253 prediction<sup>42</sup>. Here, we have restricted ourselves to applying ISR to continuous phenotypes. For  
254 case-control studies (such as maize traits SSK and YWK), we could follow previous approaches of  
255 treating binary phenotypes as continuous traits and apply ISR directly<sup>28,29,40</sup>. In the present study,  
256 as shown in Fig.4, the cluster analysis of the predictive power of different models of simulated and  
257 real phenotypes (where the distance between variables (rows and columns are the targets) and the  
258 distance between classes are respectively used by Mahalanobis distance and the sum of squares of  
259 deviations) and found that, just as the four methods with consistent simulation results, DPR, ISR,  
260 BayesA, and BayesB performed the best, in the four different simulations at three different  
261 heritability rates, the predictive power was significant, especially at high heritability rates. It is  
262 higher than the other four methods (ANOVA,  $p=4.06e-07$ , Supplementary Fig.7), but there is no  
263 significant difference between these four methods (ANOVA,  $p=0.1403$  Supplementary Fig.7).  
264 Under the moderate heritability, the average predictive power of ISR is the highest. However,



265 except that it is significantly higher than BayesC (ANOVA,  $p=0.043$ , Supplementary Fig.7) and  
266 the remaining methods have no statistically significant differences; as the same, BayesA has the  
267 highest average predictive power at low heritability, and the same except that it is significantly  
268 higher than (ANOVA,  $p=0.0141$ , Supplementary Fig.7) The difference between the outer BayesC  
269 and the remaining methods is not significant (ANOVA,  $p=0.0858$ , Supplementary Fig.7), which is  
270 consistent with the result analysis (Fig.1, Supplementary Fig.1,2). In addition, the classification  
271 given by the cluster analysis between the columns is also very reasonable (Fig.4a, the different  
272 colors of the cluster tree).

273 The true phenotype analysis is also showed the same with simulation, dividing different predictive  
274 powers into four categories from low to high (Figs.4b, different colors of cluster trees). According  
275 to previous studies, the heritability of the three traits of the for cattle species is 0.94, 0.95, and 0.88  
276 <sup>25</sup>; the grain length of rice is 0.976<sup>43</sup>; the germination rate of wheat is 0.83<sup>45</sup>. The difference between  
277 field and greenhouse experiments is 0.92 and 0.62. The proportion of variance in phenotypes  
278 explained (PVE) of the ten traits of the remaining mice is 0.49 for testweight, 0.28 for soleus, 0.25  
279 for plantaris, 0.10 for fastglucose, 0.27 for tibial, 0.60 for BMD, 0.39 for TA, 0.37 for EDL, 0.25  
280 for gastric, and 0.29 for sacweight<sup>44</sup>. It was found that all phenotypes can be grouped into four  
281 categories according to their PVE rate. For cattle, ISR and DPR have the highest average predictive  
282 ability, but there is no significant difference among the BayesA and BayesB methods (ANOVA,  
283  $p=0.7314$ ). This result is consistent with simulation Fig.2, which also shows that the differences  
284 between MSE value can explain the difference that the accuracy of difference prediction  
285 methods<sup>19,28,31,40</sup>; In contrast, BayesA, BayesB, and ISR have the highest predictive power in wheat  
286 PHS-2012 dataset, and they are significantly higher than other methods (ANOVA,  $p=0.0133$ ); and  
287 the highest predictive ability of the remaining wheat PHS is ISR, But has no difference compared  
288 with the rest of the method (ANOVA,  $p=0.976$ , Supplementary Fig.8). Here, we can find out that  
289 the estimated value of BLUP in four years which has the highest predictive ability is ISR, where  
290 is similar to Moore et al.'s research used the marker-assisted selection (0.40~0.59)<sup>48</sup>; While with  
291 the low of PVE (heritability) of CFW dataset, there are no difference in predictive ability between  
292 methods (ANOVA,  $p=0.998$ , Supplementary Fig.8), but the ISR and DPR always has the highest  
293 average predictive ability (Supplementary Table 1) .

294 In a words, the performance of all methods in simulating and real phenotype-wide prediction is  
295 consistent (performance under different heritability (PVE)). Therefore, here we use the TOPSIS<sup>49</sup>  
296 comprehensive evaluation method, which combining the averages of predictive ability of the  
297 simulation and real phenotypes as variables, and the goal is to rank all methods comprehensively.  
298 Where the result show that ISR(0.63) is perform best, and followed by DPR(0.63), BayesA(0.59),

299 BayesLASSO(0.57), rrBLUP(0.54), BayesB(0.48), BSLMM(0.36) and BayesC(0.22). While  
300 considered the wheat PHS dataset was small and affected by more the environment with different  
301 years (Supplementary Fig. 5, Supplementary Table 2,3).

302 Of course, this study only analyzes the traits related to animals and plants and does not analyze  
303 human diseases related to features (conditional restrictions). Human studies are based on tens of  
304 thousands of individuals and millions of genetic markers, just like Zeng et al.'s simulation and  
305 disease real phenotype research showed that the result currently DPR and BayesR were relatively  
306 best prediction methods<sup>19</sup>. In addition, since the control of human diseases is mainly controlled by  
307 many genes and many minor genes (many genetic markers with small effects)<sup>8,50,51</sup>, they also can  
308 reasonably estimate the effective SNP PVE (narrow-sense heritability)<sup>51,52</sup>. DPR, which is  
309 consistent with the results of the simulation study by Zeng et al<sup>19</sup>, and was indeed superior to other  
310 methods (Fig.2). However, the complex posterior distributions and computational complexity of  
311 traditional multiple integrals limited Bayesian methods<sup>20</sup>. The problem was solved after the MCMC  
312 method and the Gibbs algorithm were introduced to Bayesian statistics. However, in condition  
313  $M(\text{SNPs}) \gg N$  (samples), which MCMC and Gibbs algorithm iterations is hard to reach the  
314 convergence of the posterior means, which limits the practical application of Bayesian  
315 methods<sup>9,28,40,53,54</sup>.

316 The ISR method is not without its defects. In addition to the calculated efficiency  
317 (Supplementary Table 4), if the trait is controlled by many genes and minor genes (all SNPs genetic  
318 markers have smaller effects), then there will be cases where the predictive ability is low (Fig.1,  
319 Supplementary Fig.1,2,5). For example, the predictive power was low when simulating 500 SNPs  
320 (under low to medium heritability). However, our ISR model can fit the epistasis effect, where if  
321 the interaction between genes is considered, its predictive ability will be improved<sup>55-57</sup>. Although  
322 the simulation and real performance results show that ISR is superior to other  
323 models(Supplementary Fig. 6, Supplementary Table 2,3), there is still a lot of room for  
324 improvement in this polygenic prediction model. For example, the algorithm's improvement,  
325 combined with the optimization of the model objective function, can make the ISR perform better.  
326 The complexity of the calculation time also needs to be optimized.

327

328

329

330

331

## 332 **Methods**

333 **Overview of ISR.** We provide a brief overview of ISR here. Detailed methods and algorithms are  
334 provided<sup>42</sup>. To model the relationship between phenotypes and genotypes, we consider the  
335 following multiple regression model:

$$336 \quad y = W\alpha + X\beta + \varepsilon, \varepsilon \sim \text{MVN}(0, \delta_e^2 \mathbf{I}_n)$$

337 where  $y$  is an  $n$ -vector of phenotypes measured on  $n$  individuals;  $W=(w_1, w_2 \dots w_c)$  is an  $n$  by  $c$  matrix  
338 of covariates(fixed effects) including a column of ones for the intercept term;  $\alpha$  is a  $c$ -vector of  
339 coefficients;  $X$  is an  $n$  by  $p$  matrix of genotypes;  $\beta$  is the corresponding  $p$ -vector of effect sizes;  $\varepsilon$   
340 is an  $n$ -vector of residual errors where each element is assumed to be independently and identically  
341 distributed from a normal distribution with a variance  $\delta_e^2$ ;  $\mathbf{I}_n$  is an  $n$  by  $n$  identity matrix and MVN  
342 denotes multivariate normal distribution.

343 We used the proposed iterative screening regression model—effect size estimates obtained by the  
344 least-square method (LSM) and F-test P values for each SNP. The SNP with the most significant  
345 association is then added to the model as a cofactor for the next step. Combined the proposed  
346 iterative screening regression process, which makes it useful when  $p \gg n$  (when the number of SNPs  
347 is much greater than the number of individuals). We also proposed a new model selection criteria  
348 (RIC Fig.1) to select the most appropriate model<sup>42</sup>.

349 **Simulations.** We used genotypes from an existing cattle GWAS data set with 5024 individuals and  
350 42,551 SNPs and simulated phenotypes. To cover a range of possible genetic architectures, we  
351 consider four different simulation scenarios to cover a range of possible genetic architectures:

352 Scenario I, where we randomly selected 100 SNPs, are causal and SNPs in different effect-size  
353 groups have different effects. Specifically, we randomly selected 10 group-one SNPs, 40 group-  
354 two SNPs, 50 group-three SNPs, and set the remaining SNPs to have zero effects. We simulated  
355 SNP effect sizes all from a standard normal distribution but scaled their effects in each group  
356 separately so that the proportion of genetic variance explained by the four groups are 0.15, 0.25,  
357 and 0.60, respectively. We set the total proportion of phenotypic variance (PVE; i.e., SNP  
358 heritability) to be either 0.2, 0.5, or 0.8, representing low, moderate, and high heritability,  
359 respectively. This simulation scenario consists of one simulation setting for each PVE.

360 Scenario II based on Scenario I that we appended 50 SNPs to group-three SNPs, the remained  
361 simulation conditions were the same. These causal SNPs come from three effect-size groups. Here,  
362 the proportion of PVE by the three groups are 0.15, 0.25, and 0.6, respectively. Again, we set the  
363 total PVE to be either 0.2, 0.5, or 0.8. This simulation scenario consists of one simulation setting  
364 for each PVE.

365 Scenario III is similar to Scenario I where we randomly selected 500 SNPs are causal and SNPs  
366 in different effect-size groups have different effects. Specifically, we randomly selected 50 group-  
367 one SNPs, 150 group-two SNPs, 300 group-three SNPs, and set the remaining SNPs to have zero  
368 effects. We simulated SNP effect sizes all from a standard normal distribution but scaled their  
369 effects in each group separately so that the proportion of genetic variance explained by the four  
370 groups are 0.15, 0.25, and 0.60, respectively. We set the total proportion of phenotypic variance  
371 (PVE; i.e., SNP heritability) to be either 0.2, 0.5, or 0.8, representing low, moderate, and high  
372 heritability, respectively. This simulation scenario consists of one simulation setting for each PVE.

373 Scenario IV satisfies the BayesR modeling assumption, where we randomly selected 500 SNPs  
374 are causal and SNPs come from three effect-size groups. Specifically, we randomly selected 50  
375 group-one SNPs, 150 group-two SNPs, 300 group-three SNPs, and set the remaining SNPs to have  
376 zero effects. The simulated effect size follows a normal distribution with a mean value of 0 and a  
377 variance of  $10^{-2}$ ,  $10^{-3}$ , and  $10^{-4}$ , respectively<sup>40</sup>. Here, the proportion of PVE by the three groups are  
378 0.15, 0.25, and 0.6, respectively. Again, we set the total PVE to be either 0.2, 0.5, or 0.8. This  
379 simulation scenario consists of one simulation setting for each PVE.

380 To test the power of ISR method, Scenario I to Scenario III were more satisfies the ISR model,  
381 and Scenario IV satisfies the BayesR modeling assumption. Both the scenarios were as same as the  
382 real data perform. In each setting, we performed 20 simulation replicates. In each replicate, we  
383 randomly split the data into training data with 80% individuals and test data with the remaining 20%  
384 individuals. We then fitted different methods on the training data and evaluated their prediction  
385 performance on the test data.

386 **Cattle data.** The cattle data<sup>25</sup> consists of 5024 samples and 42,551 SNPs after removing SNPs that  
387 have a HWE p-value  $< 10^{-4}$ , a genotype call rate  $< 95\%$ , or an MAF  $< 0.01$ . For the remaining SNPs,  
388 we imputed missing genotypes with the estimated mean genotype of that SNP. We analyzed three  
389 traits: MFP, MY, and SCS. All phenotypes were quantile normalized to a standard normal  
390 distribution before analysis.

391 **Rice data.** The maize data<sup>43</sup> which after processing the data, including filtering for missing  
392 genotype data which no measure the traits, and minor allele frequencies(MAF  $< 0.05$ ), the data were  
393 composed of  $m = 464,831$  SNPs and  $n = 1,132$  individuals. For the remaining SNPs, we also  
394 imputed missing genotypes with the estimated mean genotype of that SNP. We only used the grain  
395 length (GL) as the phenotype in genomic selection.

396 **CFW data.** Outbred CFW<sup>44</sup> (Carworth Farms White) mice population that including a set of 92,734  
397 single-nucleotide polymorphism markers which were genotyped, 1,161 individuals. We analyzed  
398 ten traits: testweight, soleus, plantaris, fastglucose, tibial, BMD, TA, EDL, gastric, and sacweight.

399 The heritability estimates are 0.49 for testweight (testes weight), 0.28 for soleus, 0.25 for plantaris,  
400 0.10 for fastglucose (fasting glucose), 0.41 for tibial (tibia length), 0.60 for BMD (Bone-mineral  
401 density), 0.39 for TA (tibialis anterior), 0.37 for EDL (extensor digitorum longus), 0.25 for gastric  
402 (gastrocnemius), and 0.29 for sacweight (Testis weights)<sup>44</sup>.

403 **Wheat PHS data.** A set of 185 winter wheat accessions<sup>45</sup>, and included 27521 SNPs. The GWAS  
404 panel was evaluated for PHS in the greenhouse experiments of fall (August-December) 2011,  
405 spring (January-May) and fall 2012, and spring 2013. All experiments were conducted in a  
406 randomized complete block design with two replications of five plants. The GWAS panel was also  
407 planted for PHS resistance evaluation in the Kansas State University Rocky Ford Wheat Research  
408 Farm, Manhattan, KS and the Agricultural Research Center-Hays, Hays, KS, respectively, in the  
409 summers of 2013 and 2014. PHS values of four years were used for BLUP estimation to obtain  
410 BLUP values for prediction analysis. The broad-sense heritability across all experiments was high  
411 (0.83), with 0.62 in the greenhouse experiments and 0.92 in the field experiments<sup>45</sup>.

412 **Maize data.** As described<sup>20,58</sup> that the maize data consisted of 2279 inbred accessions and three  
413 traits, including two case/control traits: yellow or white kernels (YWK) and sweet or starchy kernels  
414 (SSK), and one quantitative trait: growing degree days (GDD). A total of 681,257 SNPs across all  
415 maize lines were obtained with genotyping by sequencing (GBS). After removing samples missing  
416 is > 20%, SNPs with either MAF < 0.01, 2279 individuals and 195,038 SNPs for GDD; 314 controls,  
417 1281 cases, and 185,493 SNPs for YWK; 2490 controls, 141 cases, and 183,225 SNPs for SSK;  
418 remained in this study. We imputation the missing genotype data with Beagle5.1  
419 (<https://faculty.washington.edu/browning/beagle/beagle.html>)<sup>59,60</sup>. And we perform the GWAS use  
420 the ISR model only (Supplementary Fig9,10,11, Supplementary Table 5). The PVE estimates are  
421 0.88 for GDD, 0.63 for SSK, 0.97 for YWK.

422 **Other methods.** We compared the performance of ISR mainly with seven existing methods: (1)  
423 DPR<sup>19</sup>; (2) BSLMM (implemented in the GEMMA software (version 0.95alpha))<sup>28</sup>; (3) BayesA;  
424 (4) BayesB; (5) BayesC; (6) Bayes LASSO; (7) rrBLUP<sup>35</sup>, (8) BayesR<sup>40</sup>. Among them (3)-(6) the  
425 method of receiving in BGLR R package. We used default settings to fit all these methods. To  
426 measure prediction performance, we carried out 20 Monte Carlo cross-validation data splits as in  
427 simulations. In each data split, we fitted methods in a training set with 80% of randomly selected  
428 individuals and evaluated method performance using  $R^2$  in the test set with the remaining 20% of  
429 individuals. Because the wheat data set is small, we use the 10-fold cross-validation method to  
430 analyze the predictive power of different methods, which is to divide the sample into ten equal parts  
431 each time randomly, and nine of them are used as training samples. The other one is used as a

432 verification sample, and nine samples are used to estimate the parameters to predict the remaining  
 433 one, and the loop 10 times in turn until all individuals are predicted.

434 **TOPSIS method.** TOPSIS (Technique for Order Preference by Similarity to Ideal Solution), the  
 435 technique of approximating the ideal solution, is a multi-criteria decision analysis method. The  
 436 basic idea of this method is to define the ideal solution and the negative ideal solution of the  
 437 decision-making problem. After the ideal solution and the negative ideal solution are determined,  
 438 the distance between the evaluation object and the optimal solution and the worst solution is  
 439 calculated respectively, so as to obtain and the optimal solution through calculation. If a certain  
 440 evaluation object is infinitely close to the ideal solution and at the same time far away from the  
 441 negative ideal solution, then this solution is the optimal solution.

442 How to calculate the distance is very important. The TOPSIS method uses the Euclidean distance  
 443 function to calculate the distance between the evaluation object and the ideal solution and the  
 444 negative ideal solution. The Euclidean distance describes the true distance between two points in  
 445 the  $p$ -dimensional space. Here, suppose there are two points in space  $A = (a_1, a_2, \dots, a_n)$  and  
 446  $B = (b_1, b_2, \dots, b_n)$ , then, The Euclidean distance calculation formula is as follows:

447 
$$d(A, B) = \sqrt{\sum (a_i - b_i)^2}, (i = 1, 2, \dots, n)$$

448 Suppose the sample material is a multi-attribute decision-making matrix with  $n$  evaluation  
 449 objects and  $m$  evaluation indicators The TOPSIS process is carried out as follows:

450 Step 1: Convergence processing for each index of the sample material. As the evaluation  
 451 process requires the same trend of indicators, that is, either the higher the better, or the lower the  
 452 better. Therefore, the original data needs to be converted, that is, the conversion of low-quality  
 453 indicators to high-quality indicators or the conversion of high-quality indicators to low-quality  
 454 indicators.

455 (1) 
$$x'_{ij} = \begin{cases} x_{ij} & \text{High-quality index} \\ 1/x_{ij} & \text{Low-quality index} \\ M / [M + |x_{ij} - M|] & \text{Neutral index} \end{cases}$$

459

460

461 Step 2: Construct a normalized decision matrix. In the target decision-making, the different  
 462 dimensions of the evaluation index will have a great impact on the evaluation result. The range of  
 463 changes of each index is different, and there is no unified measurement standard. Therefore, the  
 464 decision matrix needs to be normalized.

$$(2) \quad Z_{ij} = \begin{cases} \frac{x_{ij}}{\sqrt{\sum_{i=1}^n (x_{ij})^2}} & \text{(original high-quality index)} \\ \frac{x'_{ij}}{\sqrt{\sum_{i=1}^n (x'_{ij})^2}} & \text{(original low-quality index and Neutral index)} \end{cases}$$

471 Step 3: Find the best plan and the worst plan:

$$472 \quad Z^+ = (Z_1^+, Z_2^+, \dots, Z_m^+) = \left\{ \max_i Z_{ij} \mid j = 1, 2, \dots, m \right\} \quad (3)$$

$$473 \quad Z^- = (Z_1^-, Z_2^-, \dots, Z_m^-) = \left\{ \min_i Z_{ij} \mid j = 1, 2, \dots, m \right\} \quad (4)$$

474 Step 4: Calculate the Euclidean distance between each evaluation object and the ideal solution  
475 and the negative ideal solution.

$$476 \quad D_i^+ = \sqrt{\sum_{j=1}^m (Z_{ij}^+ - Z_{ij})^2}, \quad D_i^- = \sqrt{\sum_{j=1}^m (Z_{ij}^- - Z_{ij})^2} \quad (5)$$

477 In the formula,  $D_i^+$  and  $D_i^-$  respectively represent the distance between the  $i$ -th evaluation  
478 object and the ideal solution and the negative ideal solution; represent the  $j$ -th index data of the  $i$ -  
479 th material in the normalized matrix.

480 Step 5: Calculate the closeness of  $C_i$  each target solution to the optimal solution to reflect the  
481 quality of the target solution.

$$482 \quad C_i = \frac{D_i^-}{D_i^+ + D_i^-}, (0 \leq C_i \leq 1), C_i \rightarrow 1 \quad (5)$$

483 Step 6: Sort by size  $C_i$  and give the evaluation result. The larger the value of  $C_i$ , the better  
484 the overall benefit and the better the plan.

485 **Cluster method.** Here, we used hierarchical clustering to evaluate the different methods perform  
486 and use the heat map with dendrograms to show the result. Algorithm for computing the distance  
487 between clusters that we use the ward method and the distance metric was calculated by  
488 Mahalanobis distance, as follows:

$$489 \quad d_{st}^2 = (x_s - x_t)C^{-1}(x_s - x_t)'$$

490 where  $C$  is the covariance matrix. Mahalanobis distance is widely used in cluster analysis and  
491 classification techniques. It is closely related to Hotelling's T-square distribution used for

492 multivariate statistical testing and Fisher's Linear Discriminant Analysis that is used for supervised  
493 classification<sup>61</sup>.

494

495 **Code availability.** Our method is implemented in the ISR software included TOPSIS and cluster  
496 methods, and all script methods analysis in this study can freely available at  
497 <https://github.com/czheluo/PPISR> and <https://github.com/czheluo/ISR>.

498

#### 499 **Data availability**

500 No data were generated in the present study. The genotype and phenotype data from the Cattle  
501 from<sup>25</sup>and Cattle: <https://www.g3journal.org/content/5/4/615>. supplemental; and

502 Maize: <https://datacommons.cyverse.org/browse/iplant/home/shared/panzea>. And rice data studies  
503 are available <http://www.ricediversity.org/data/>. The outbred CFW mice of genotype and  
504 phenotype data are publicly available at <https://github.com/pcarbo/cfw>, and the genotype was as  
505 same as the Parker, C.C et..<sup>42,44</sup> and the wheat PHS data set provided by Prof. Guihua Bai at the  
506 Kansas State University.

507

#### 508 **Author contributions**

509 Shiliang Gu and Meng Luo conceived the study and supervised statistical aspects and developed  
510 the algorithm of this work, and developed the software. Meng Luo designed the experiment and  
511 performed the simulations and data analyses. Meng Luo wrote the manuscript.

512

#### 513 **Competing interests**

514 The authors declare no competing interests.

515

#### 516 **Additional information**

517 Supplementary Information accompanies this paper.

518

519

520

521

522

523



524 **References**

- 525 1. Makowsky, R. *et al.* Beyond Missing Heritability: Prediction of Complex Traits. *PLOS*  
526 *Genetics* **7**, e1002051 (2011).
- 527 2. Millet, E.J., Kruijer, W., Coupel-Ledru, A., Prado, S.A. & Tardieu, F. Genomic prediction of  
528 maize yield across European environmental conditions. *Nature Genetics* **51**(2019).
- 529 3. Wray, N.R. *et al.* Pitfalls of predicting complex traits from SNPs. *Nature Reviews Genetics*  
530 **14**, 507 (2013).
- 531 4. Hayes, B.J., Pryce, J., Chamberlain, A.J., Bowman, P.J. & Goddard, M.E. Genetic  
532 Architecture of Complex Traits and Accuracy of Genomic Prediction: Coat Colour, Milk-  
533 Fat Percentage, and Type in Holstein Cattle as Contrasting Model Traits. *PLOS Genetics* **6**,  
534 e1001139 (2010).
- 535 5. Georges, M., Charlier, C. & Hayes, B. Harnessing genomic information for livestock  
536 improvement. *Nature Reviews Genetics* **20**, 135-156 (2019).
- 537 6. Desta, Z.A. & Ortiz, R. Genomic selection: genome-wide prediction in plant improvement.  
538 *Trends in Plant Science* **19**, 592-601 (2014).
- 539 7. Khera, A.V. *et al.* Polygenic Prediction of Weight and Obesity Trajectories from Birth to  
540 Adulthood. *Cell* **177**, 587-596.e9 (2019).
- 541 8. Chatterjee, N., Shi, J. & García-Closas, M. Developing and evaluating polygenic risk  
542 prediction models for stratified disease prevention. *Nature Reviews Genetics* **17**, 392-406  
543 (2016).
- 544 9. Ge, T., Chen, C.-Y., Ni, Y., Feng, Y.-C.A. & Smoller, J.W. Polygenic prediction via Bayesian  
545 regression and continuous shrinkage priors. *Nature Communications* **10**, 1776 (2019).
- 546 10. Khera, A.V. *et al.* Genome-wide polygenic scores for common diseases identify individuals  
547 with risk equivalent to monogenic mutations. *Nature Genetics* **50**, 1219-1224 (2018).
- 548 11. Maier, R.M. *et al.* Improving genetic prediction by leveraging genetic correlations among  
549 human diseases and traits. *Nature Communications* **9**, 989 (2018).
- 550 12. Pasaniuc, B. & Price, A.L. Dissecting the genetics of complex traits using summary  
551 association statistics. *Nature Reviews Genetics* **18**, 117-127 (2017).
- 552 13. Chatterjee, N., Shi, J. & García-Closas, M. Developing and evaluating polygenic risk  
553 prediction models for stratified disease prevention. *Nature Reviews Genetics* **17**, 392  
554 (2016).
- 555 14. Wiggans, G.R., Cole, J.B., Hubbard, S.M. & Sonstegard, T.S. Genomic Selection in Dairy  
556 Cattle: The USDA Experience. *Annual Review of Animal Biosciences* **5**, 309-327 (2017).
- 557 15. Crossa, J. *et al.* Genomic Selection in Plant Breeding: Methods, Models, and Perspectives.  
558 *Trends in Plant Science* **22**, 961-975.
- 559 16. Lozada, D.N., Mason, R.E., Sarinelli, J.M. & Brown-Guedira, G. Accuracy of genomic  
560 selection for grain yield and agronomic traits in soft red winter wheat. *BMC Genetics* **20**,  
561 82 (2019).
- 562 17. Ali, M., Zhang, Y., Rasheed, A., Wang, J. & Zhang, L. Genomic Prediction for Grain Yield  
563 and Yield-Related Traits in Chinese Winter Wheat. *International Journal of Molecular*  
564 *Sciences* **21**(2020).
- 565 18. Gamazon, E.R. A gene-based association method for mapping traits using reference  
566 transcriptome data. *Nat. Genet.* **47**(2015).
- 567 19. Zeng, P. & Zhou, X. Non-parametric genetic prediction of complex traits with latent  
568 Dirichlet process regression models. *Nature Communications* **8**, 456 (2017).
- 569 20. Yin, L. *et al.* KAML: improving genomic prediction accuracy of complex traits using  
570 machine learning determined parameters. *Genome Biology* **21**, 146 (2020).

- 571 21. Lango Allen, H. *et al.* Hundreds of variants clustered in genomic loci and biological  
572 pathways affect human height. *Nature* **467**, 832 (2010).
- 573 22. Locke, A.E. *et al.* Genetic studies of body mass index yield new insights for obesity biology.  
574 *Nature* **518**, 197-206 (2015).
- 575 23. Huang, X. *et al.* Genome-wide association studies of 14 agronomic traits in rice landraces.  
576 *Nature Genetics* **42**, 961-967 (2010).
- 577 24. Fernandes Júnior, G.A. *et al.* Genomic prediction of breeding values for carcass traits in  
578 Nellore cattle. *Genetics Selection Evolution* **48**, 7 (2016).
- 579 25. Zhang, Z. *et al.* Accuracy of Whole-Genome Prediction Using a Genetic Architecture-  
580 Enhanced Variance-Covariance Matrix. *G3: Genes/Genomes/Genetics* **5**, 615 (2015).
- 581 26. Meuwissen, T., Hayes, B. & Goddard, M. Accelerating Improvement of Livestock with  
582 Genomic Selection. *Annual Review of Animal Biosciences* **1**, 221-237 (2013).
- 583 27. Klasen, J.R. *et al.* A multi-marker association method for genome-wide association studies  
584 without the need for population structure correction. **7**, 13299 (2016).
- 585 28. Zhou, X., Carbonetto, P. & Stephens, M. Polygenic Modeling with Bayesian Sparse Linear  
586 Mixed Models. *PLOS Genetics* **9**, e1003264 (2013).
- 587 29. Speed, D. & Balding, D.J. MultiBLUP: improved SNP-based prediction for complex traits.  
588 *Genome Research* **24**, 1550-1557 (2014).
- 589 30. Chatterjee, N. *et al.* Projecting the performance of risk prediction based on polygenic  
590 analyses of genome-wide association studies. *Nature Genetics* **45**, 400 (2013).
- 591 31. Weissbrod, O., Geiger, D. & Rosset, S. Multikernel linear mixed models for complex  
592 phenotype prediction. *Genome Research* **26**, 969-979 (2016).
- 593 32. Shah, S. *et al.* Improving Phenotypic Prediction by Combining Genetic and Epigenetic  
594 Associations. *The American Journal of Human Genetics* **97**, 75-85.
- 595 33. Yang, J. *et al.* Common SNPs explain a large proportion of the heritability for human height.  
596 *Nature Genetics* **42**, 565-569 (2010).
- 597 34. VanRaden, P.M. Efficient Methods to Compute Genomic Predictions. *Journal of Dairy*  
598 *Science* **91**, 4414-4423 (2008).
- 599 35. Endelman, J.B. Ridge Regression and Other Kernels for Genomic Selection with R Package  
600 rrBLUP. *The Plant Genome* **4**, 250-255 (2011).
- 601 36. Habier, D., Fernando, R.L., Kizilkaya, K. & Garrick, D.J. Extension of the bayesian alphabet  
602 for genomic selection. *BMC Bioinformatics* **12**, 186 (2011).
- 603 37. Meuwissen, T.H., Hayes, B.J. & Goddard, M.E. Prediction of total genetic value using  
604 genome-wide dense marker maps. *Genetics* **157**, 1819-1829 (2001).
- 605 38. Park, T. & Casella, G. The Bayesian Lasso. *Journal of the American Statistical Association*  
606 **103**, 681-686 (2008).
- 607 39. Yi, N. & Xu, S. Bayesian LASSO for Quantitative Trait Loci Mapping. *Genetics* **179**, 1045  
608 (2008).
- 609 40. Moser, G. *et al.* Simultaneous Discovery, Estimation and Prediction Analysis of Complex  
610 Traits Using a Bayesian Mixture Model. *PLOS Genetics* **11**, e1004969 (2015).
- 611 41. Cheng, W., Ramachandran, S. & Crawford, L. Estimation of non-null SNP effect size  
612 distributions enables the detection of enriched genes underlying complex traits. *PLOS*  
613 *Genetics* **16**, e1008855 (2020).
- 614 42. Luo, M. & Gu, S. A new approach of dissecting genetic effects for complex traits. *bioRxiv*,  
615 2020.10.16.336180 (2020).
- 616 43. McCouch, S.R. *et al.* Open access resources for genome-wide association mapping in rice.  
617 *Nature Communications* **7**, 10532 (2016).

- 618 44. Parker, C.C. *et al.* Genome-wide association study of behavioral, physiological and gene  
619 expression traits in outbred CFW mice. *Nature Genetics* **48**, 919 (2016).
- 620 45. Lin, M. *et al.* Genome-wide association analysis on pre-harvest sprouting resistance and  
621 grain color in U.S. winter wheat. *BMC Genomics* **17**, 794 (2016).
- 622 46. Hu, Z.-L., Park, C.A., Wu, X.-L. & Reecy, J.M. Animal QTLdb: an improved database tool for  
623 livestock animal QTL/association data dissemination in the post-genome era. *Nucleic  
624 Acids Research* **41**, D871-D879 (2013).
- 625 47. Carbonetto, P. & Stephens, M. Stephens M: Scalable variational inference for Bayesian  
626 variable selection in regression, and its accuracy in genetic association studies. *Bayesian  
627 Analysis*. *Bayesian Analysis* **7**, 73-107 (2013).
- 628 48. Moore, J.K. *et al.* Improving Genomic Prediction for Pre-Harvest Sprouting Tolerance in  
629 Wheat by Weighting Large-Effect Quantitative Trait Loci. *Crop Science* **57**, 1315-1324  
630 (2017).
- 631 49. Yoon, K. A Reconciliation Among Discrete Compromise Solutions. *Journal of the  
632 Operational Research Society* **38**, 277-286 (1987).
- 633 50. Vilhjálmsson, Bjarni J. *et al.* Modeling Linkage Disequilibrium Increases Accuracy of  
634 Polygenic Risk Scores. *The American Journal of Human Genetics* **97**, 576-592 (2015).
- 635 51. Yang, J., Zeng, J., Goddard, M.E., Wray, N.R. & Visscher, P.M. Concepts, estimation and  
636 interpretation of SNP-based heritability. *Nature Genetics* **49**, 1304 (2017).
- 637 52. Speed, D. *et al.* Reevaluation of SNP heritability in complex human traits. *Nature Genetics*  
638 **49**, 986 (2017).
- 639 53. Zhu, X. & Stephens, M. Bayesian large-scale multiple regression with summary statistics  
640 from genome-wide association studies. *Annals of Applied Statistics* **11**, 1561-1592 (2016).
- 641 54. Muller, P. & Mitra, R. Bayesian Nonparametric Inference - Why and How. *Bayesian Anal.*  
642 **8**, 269-302 (2013).
- 643 55. Martini, J.W.R. *et al.* Genomic prediction with epistasis models: on the marker-coding-  
644 dependent performance of the extended GBLUP and properties of the categorical  
645 epistasis model (CE). *BMC Bioinformatics* **18**, 3 (2017).
- 646 56. Akdemir, D., Jannink, J.L. & Isidrosánchez, J. Locally epistatic models for genome-wide  
647 prediction and association by importance sampling. *Genetics Selection Evolution* **49**, 74  
648 (2017).
- 649 57. Forneris, N.S., Vitezica, Z.G., Legarra, A. & Pérez-Enciso, M. Influence of epistasis on  
650 response to genomic selection using complete sequence data. *Genetics Selection  
651 Evolution* **49**, 66 (2017).
- 652 58. Romay, M.C. *et al.* Comprehensive genotyping of the USA national maize inbred seed  
653 bank. *Genome Biology* **14**, R55 (2013).
- 654 59. Browning, B.L., Zhou, Y. & Browning, S.R. A One-Penny Imputed Genome from Next-  
655 Generation Reference Panels. *The American Journal of Human Genetics* **103**, 338-348  
656 (2018).
- 657 60. Browning, S.R. & Browning, B.L. Rapid and Accurate Haplotype Phasing and Missing-Data  
658 Inference for Whole-Genome Association Studies By Use of Localized Haplotype  
659 Clustering. *The American Journal of Human Genetics* **81**, 1084-1097 (2007).
- 660 61. McLachlan, G.J. Discriminant Analysis and Statistical Pattern Recognition. *Wiley-  
661 Interscience* (1992).

663  
664  
665  
666  
667  
668  
669  
670  
671  
672  
673  
674  
675  
676  
677  
678  
679  
680  
681  
682  
683  
684  
685  
686  
687  
688  
689  
690  
691  
692  
693  
694  
695

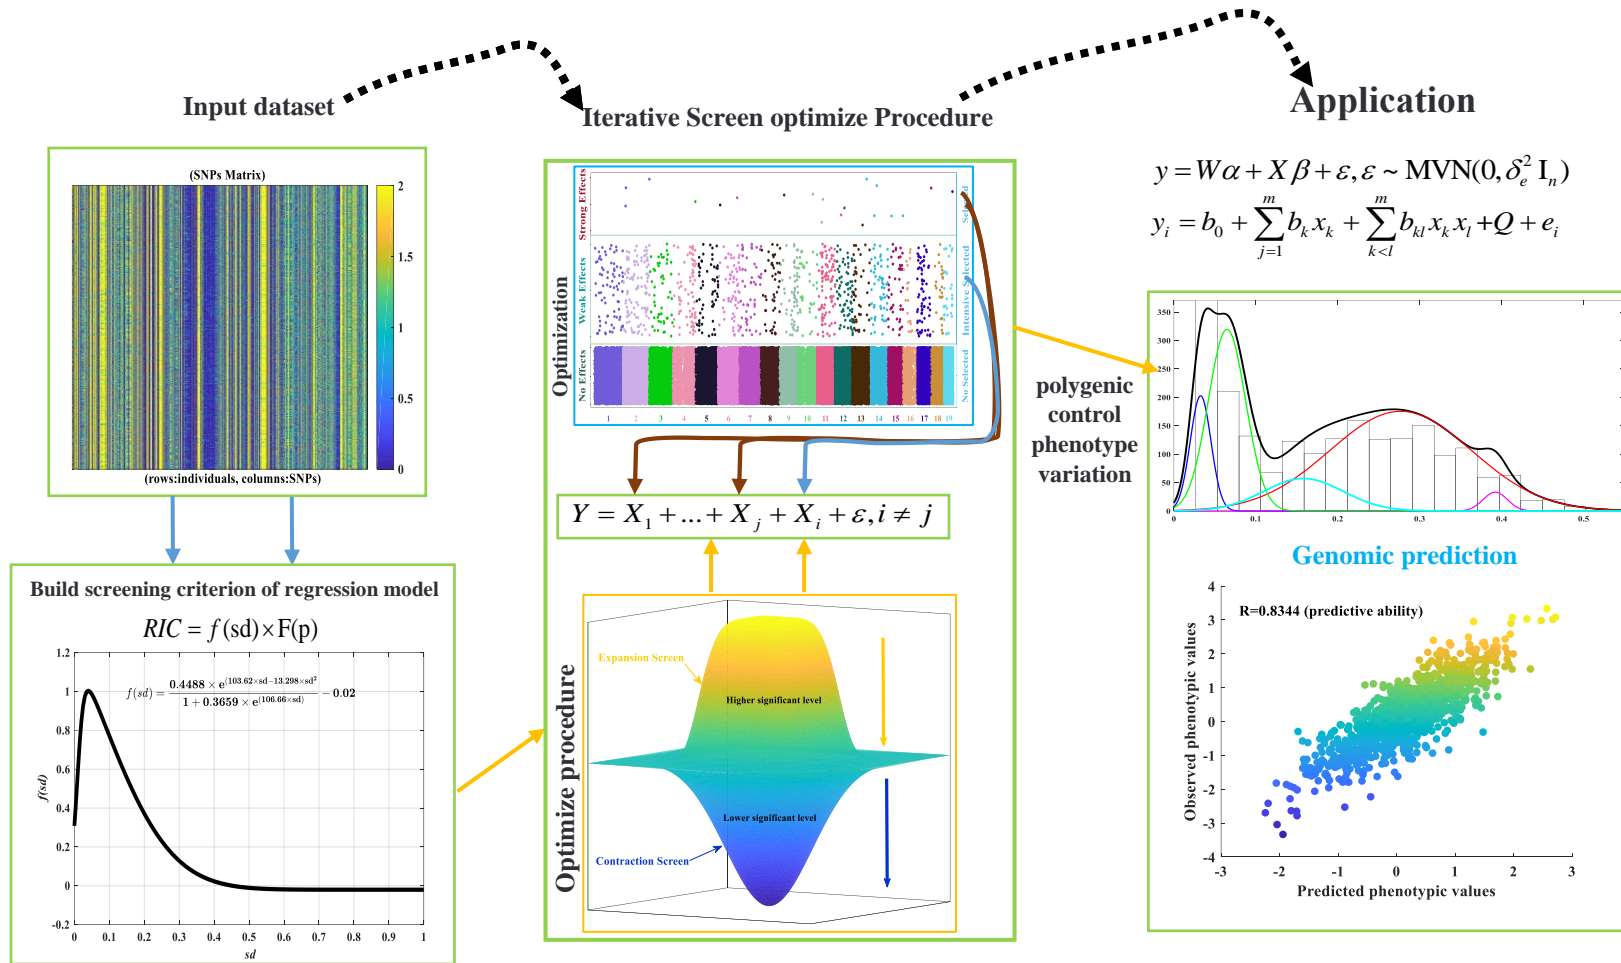

**Fig. 1 Schematic overview of model-based is iterative screening regression for GS.** The first input dataset with markers (SNPs) matrix representing individual genotypes (rows) of a population with alleles (0, 2, and 1, missing genotypes will be replaced by the mean genotype or imputed by others complicate algorithm) per marker (columns). Secondly, we formulated a regression information criterion (RIC, objective function) as the screening criterion of the regression model. Combined the proposed iterative screen optimize the procedure, which mainly included expansion screen and contraction select two-steps. The third, apply it to multiple regression analysis, and two models can be selected, one for the linear model and the other for is the binomial model (including the epistasis effect). Here, we show the polygenic prediction of complex traits which the PHB phenotype distribution, where according to the character numerical simulation and we found the optimal equation that is five normally distributed superpositions and the black curve is explanation all models. Each of the models is blue curve, green curve, red curve, cyan curve, and purper curve (five major genes), and the best fitting model is finally selected as follows, and the optimal parameters estimated see the supplementary Table 6, From  $R^2 = 0.9982$  (determination coefficient), it can be seen that the fitting degree is very high. This model can well explain the character (Figure 2). Except for  $b_{13}$  and  $b_{14}$ , all the other T-tests reached a significant level.

$$f(x) = b_1 \exp(-b_2(x - b_3))^2 + b_4 \exp(-b_5(x - b_6))^2 + b_7 \exp(-b_8(x - b_9))^2 + b_{10} \exp(-b_{11}(x - b_{12}))^2 + b_{13} \exp(-b_{14}(x - b_{15}))^2$$

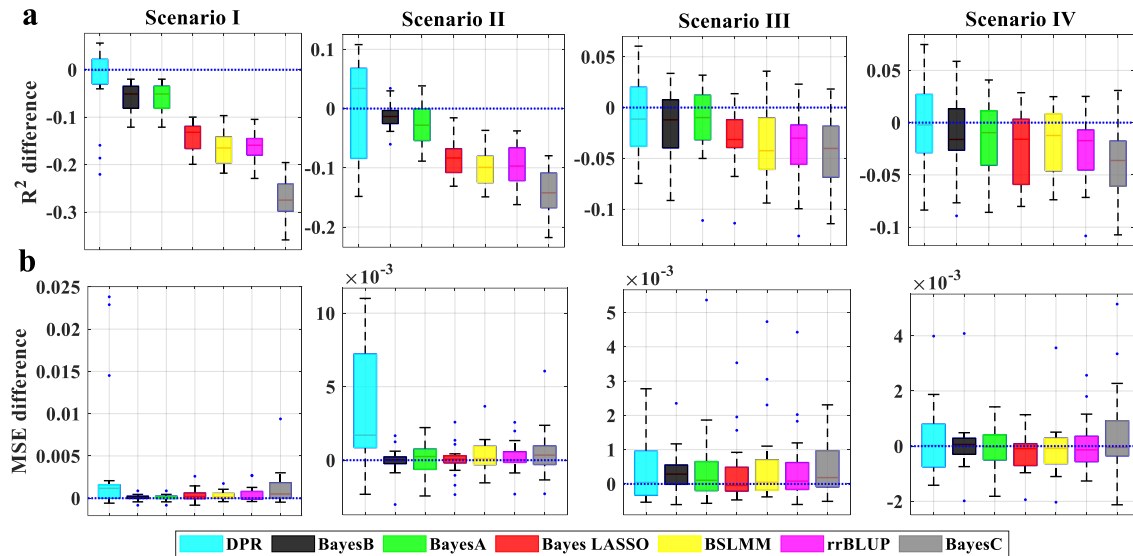

696

697 **Fig. 2 Comparison of prediction performance of seven methods with ISR in simulations when PVE =**  
 698 **0.5.** Performance is measured by  $R^2$  difference (a) and MSE difference (b) with respect to ISR, where an  $R^2$   
 699 difference below zero (i.e., values below the blue horizontal line) or an MSE difference above zero suggests  
 700 worse performance than ISR. The sample  $R^2$  and MSE differences are obtained from 20 replicates in each  
 701 scenario. Methods for comparison include DPR (cyan), BayesB (black), BayesA (green), Bayes LASSO (red),  
 702 BSLMM (yellow), rrBLUP (purple), and BayesC (gray). Simulation scenarios include Scenario I, Scenario  
 703 II, and Scenario III, which satisfies the DPR modeling assumption; where the number of SNPs in the large  
 704 effect group is 100, 150, or 500; and Scenario IV, which satisfies the BayesR modeling assumption; For  
 705 each box plot, the bottom and top of the box are the first and third quartiles, while the ends of whiskers  
 706 represent either the lowest datum within 1.5 interquartile range of the lower quartile or the highest datum  
 707 within 1.5 interquartile range of the upper quartile. For ISR, the mean predictive  $R^2$  in the test set and the  
 708 standard deviation for the eight settings are, respectively, 0.441 (0.019), 0.331 (0.028), 0.267 (0.016), 0.271  
 709 (0.023)

710

711

712

713

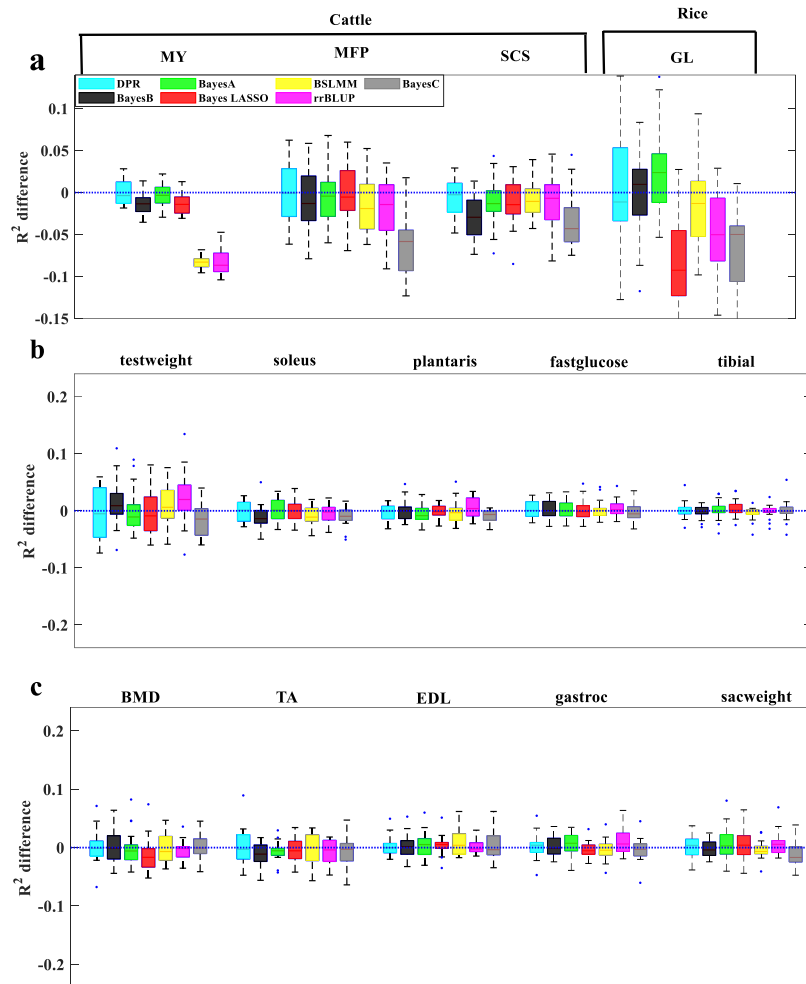

714

715 **Fig. 3 Comparison of prediction performance of seven methods with ISR for fourteen traits from three**  
 716 **data sets.** a Prediction performance for MFP, MY, and SCS in the cattle data, and for GL in the rice data;  
 717 b,c Prediction performance for the ten traits in the mice data. Performance is measured by  $R^2$  difference with  
 718 respect to ISR, where a negative value (i.e., values below the red horizontal line) indicates worse performance  
 719 than ISR. Methods for comparison include DPR (cyan), BayesB (black), BayesA (green), Bayes LASSO  
 720 (red), BSLMM (yellow), rrBLUP (purple), and BayesC (gray). For each box plot, the bottom and top of the  
 721 box are the first and third quartiles, while the ends of whiskers represent either the lowest datum within 1.5  
 722 interquartile range of the lower quartile or the highest datum within 1.5 interquartile range of the upper  
 723 quartile. The sample  $R^2$  differences are obtained from 20 replicates of Monte Carlo cross-validation for each  
 724 trait. For ISR, the mean predictive  $R^2$  in the test set and the standard deviation across replicates are  
 725 0.747(0.007) for MFP, 0.618(0.03) for MY, 0.554(0.018) for SCS and 0.658(0.032) for GL, 0.078(0.024) for  
 726 testweight, 0.024(0.012) for soleus, 0.017(0.011) for plantaris, 0.018(0.009) for fastglucose, 0.008(0.01) for  
 727 tibial, 0.057(0.008) for BMD, 0.028(0.016) for TA, 0.022(0.005) for EDL, 0.02(0.013) for gastric, and  
 728 0.028(0.01) for sacweight. The heritability estimates are 0.912 for MFP, 0.810 for MY, 0.801 for SCS, and

729 0.976 for GL, 0.49 for testweight, 0.28 for soleus, 0.25 for plantaris, 0.10 for fastglucose, 0.27 for tibial, 0.60  
 730 for BMD, 0.39 for TA, 0.37 for EDL, 0.25 for gastric, and 0.29 for sacweight.

731

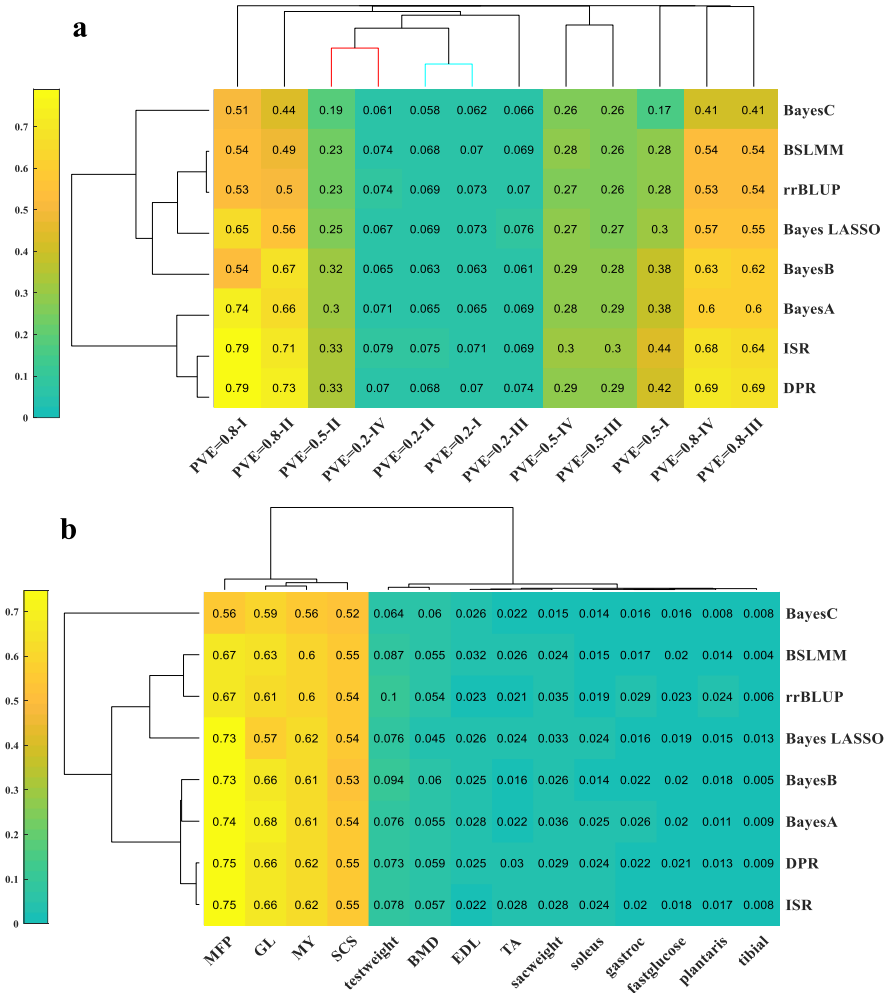

732

733 **Fig. 4 The clustering result with heatmap.** Based on the Simulations and Real data applications (did not  
 734 include the wheat PHS data) results in the averaged prediction of  $R^2$

735

736

737

738

739

740

741
